# Supplementary material
Source: PubMed Central journal article supplement (PMC6864144)

**Figure 1**

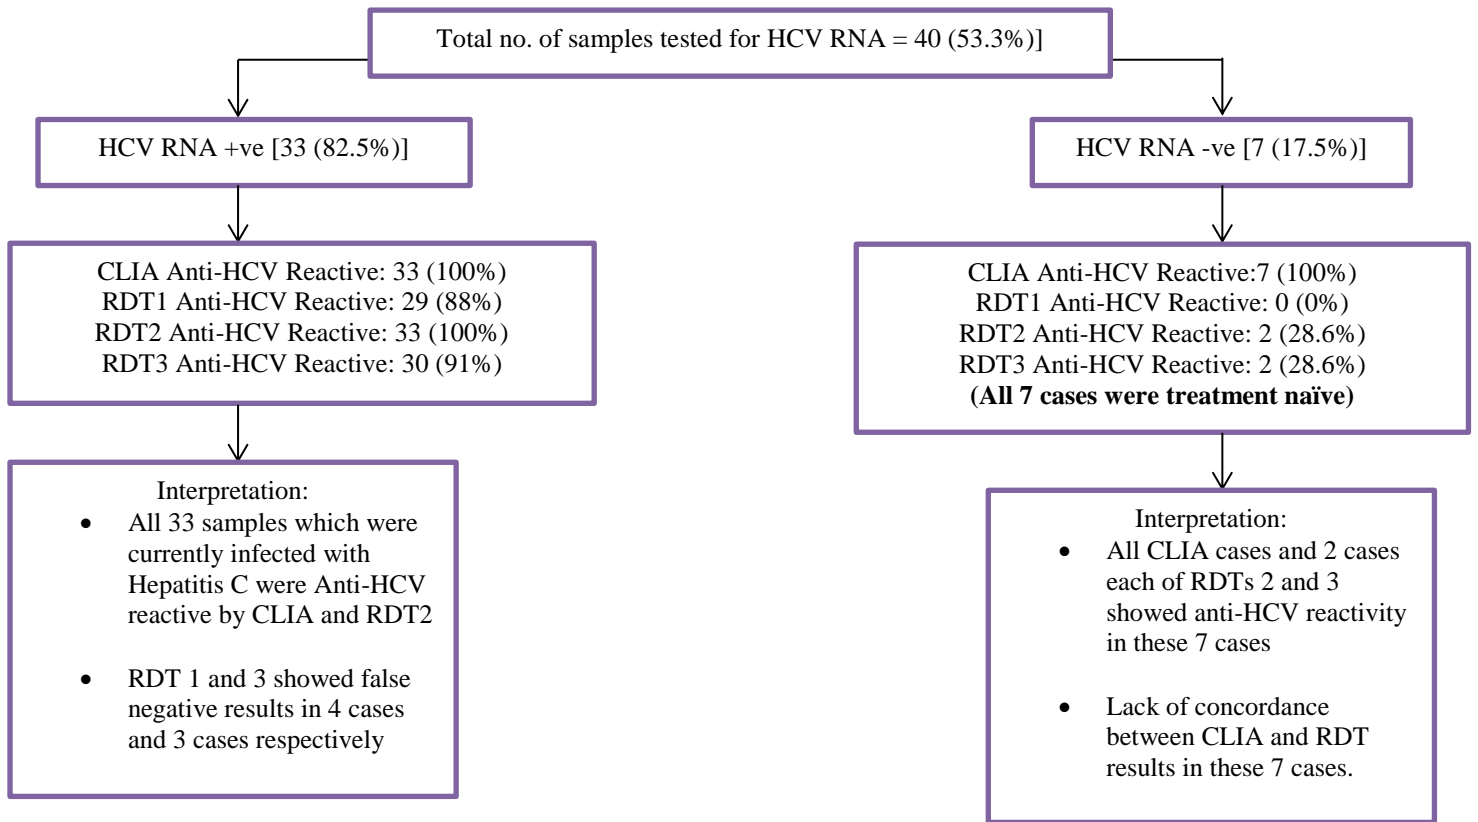

Supplement: 13337_2019_542_MOESM1_ESM.pdf [file 13337_2019_542_MOESM1_ESM.pdf]

**Figure 2**

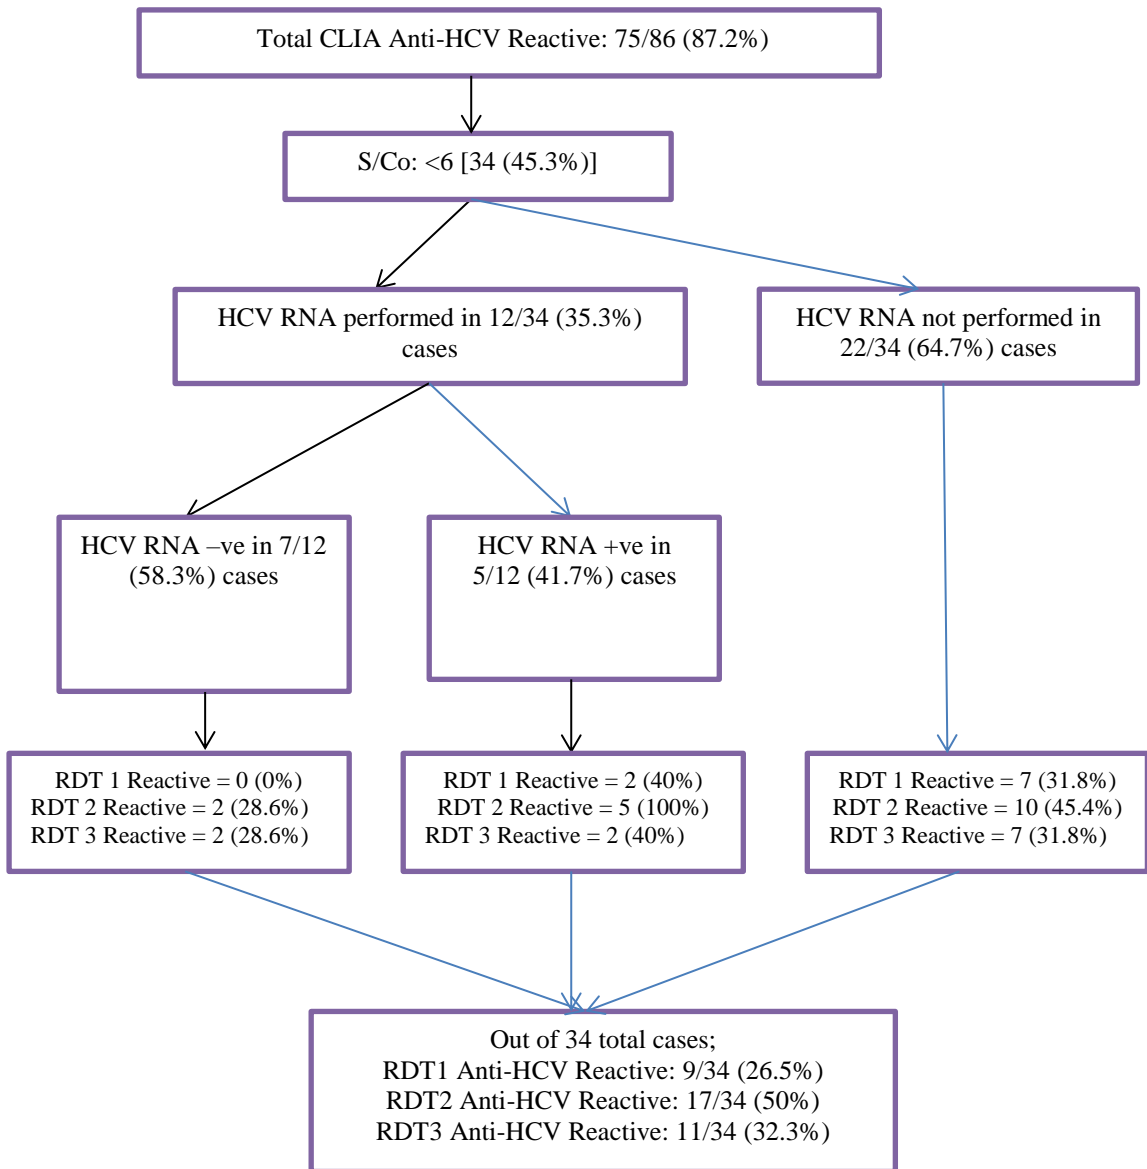

Supplement: 13337_2019_542_MOESM2_ESM.pdf [file 13337_2019_542_MOESM2_ESM.pdf]

**Figure 3**

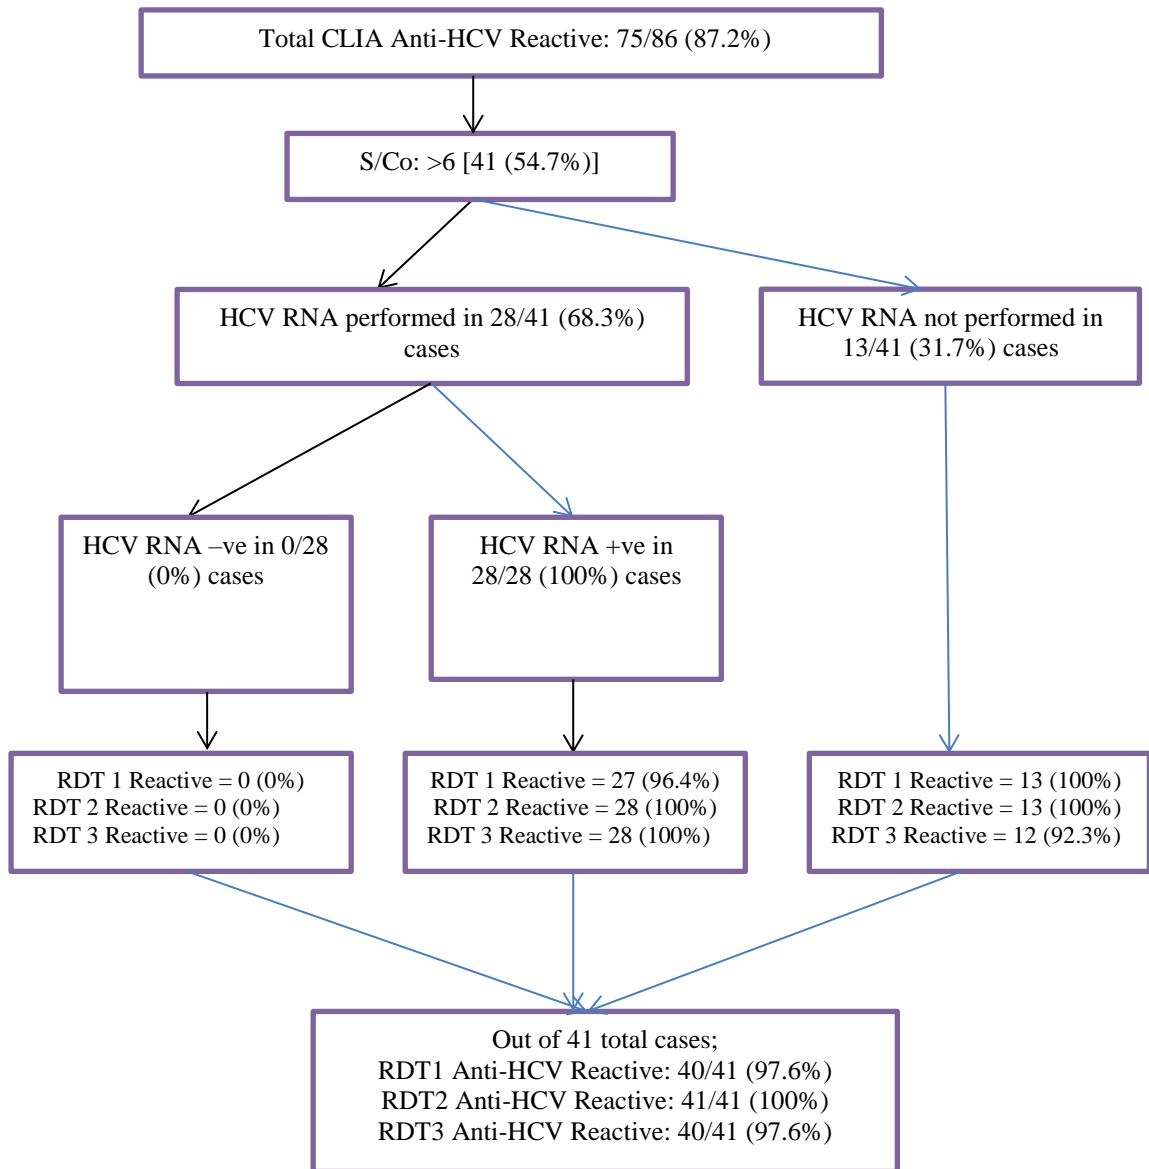

Supplement: 13337_2019_542_MOESM3_ESM.pdf [file 13337_2019_542_MOESM3_ESM.pdf]
